# Supplementary material for: Estimates of Genetic Differentiation Measured by FST Do Not Necessarily Require Large Sample Sizes When Using Many SNP Markers
Source: PLOS journal article supplement (doi:10.1371/journal.pone.0042649), 2012-08-14

Figure S1: Normal allele frequencies

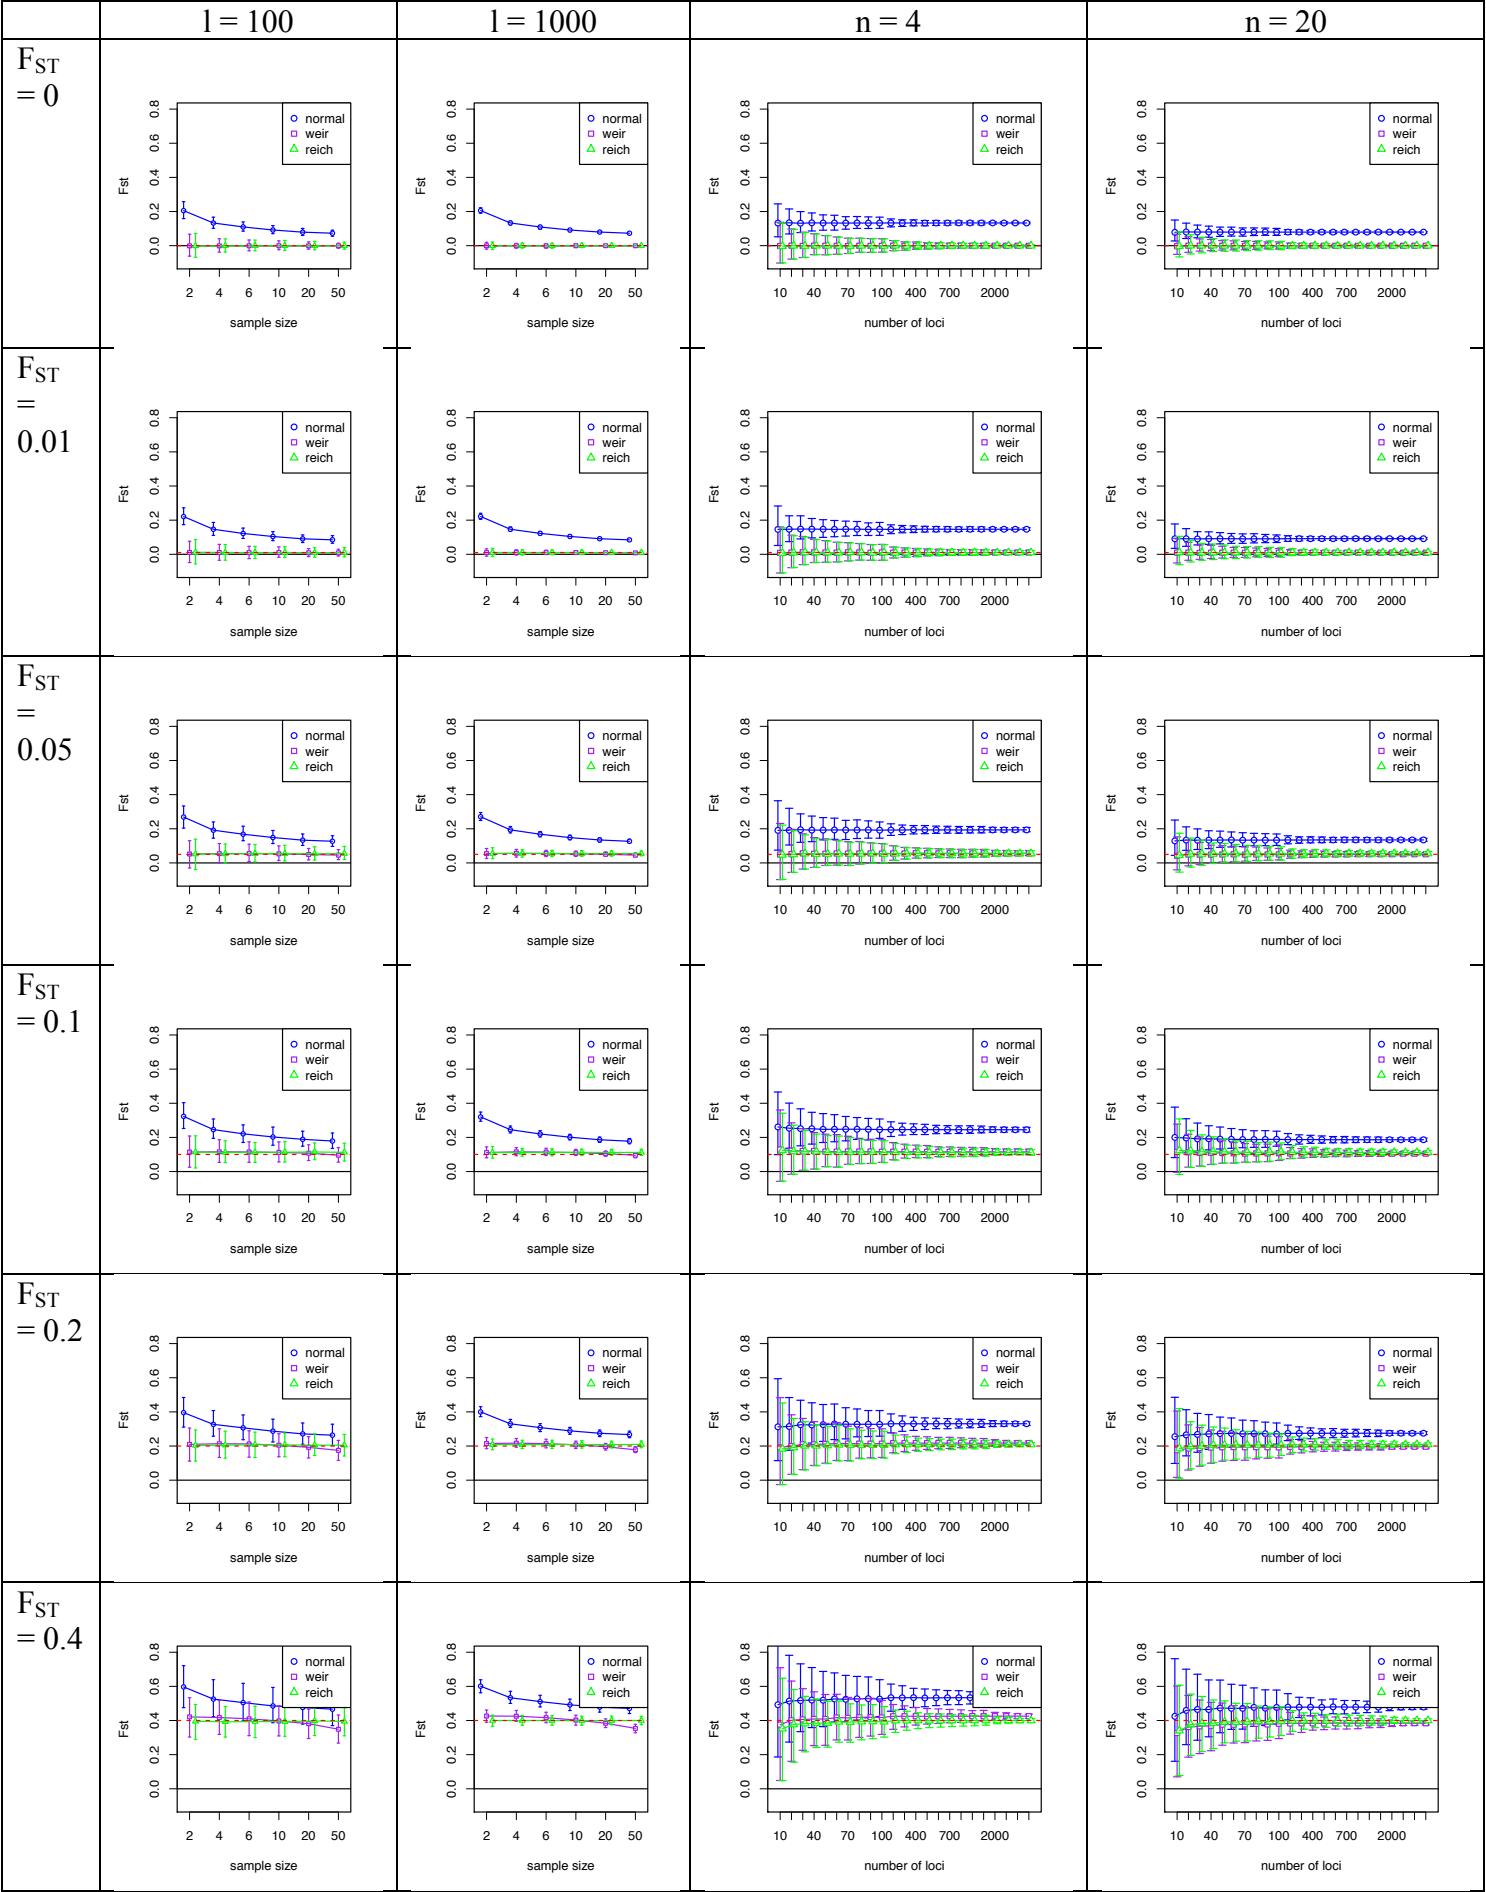

Supplement: S1 (10.1371/journal.pone.0042649.s001) [file journal.pone.0042649.s001]
