# Supplementary material for: Estimates of Genetic Differentiation Measured by FST Do Not Necessarily Require Large Sample Sizes When Using Many SNP Markers
Source: PLOS journal article supplement (doi:10.1371/journal.pone.0042649), 2012-08-14

**Figure S3: Skewed allele frequencies (MAF < 0.25)**

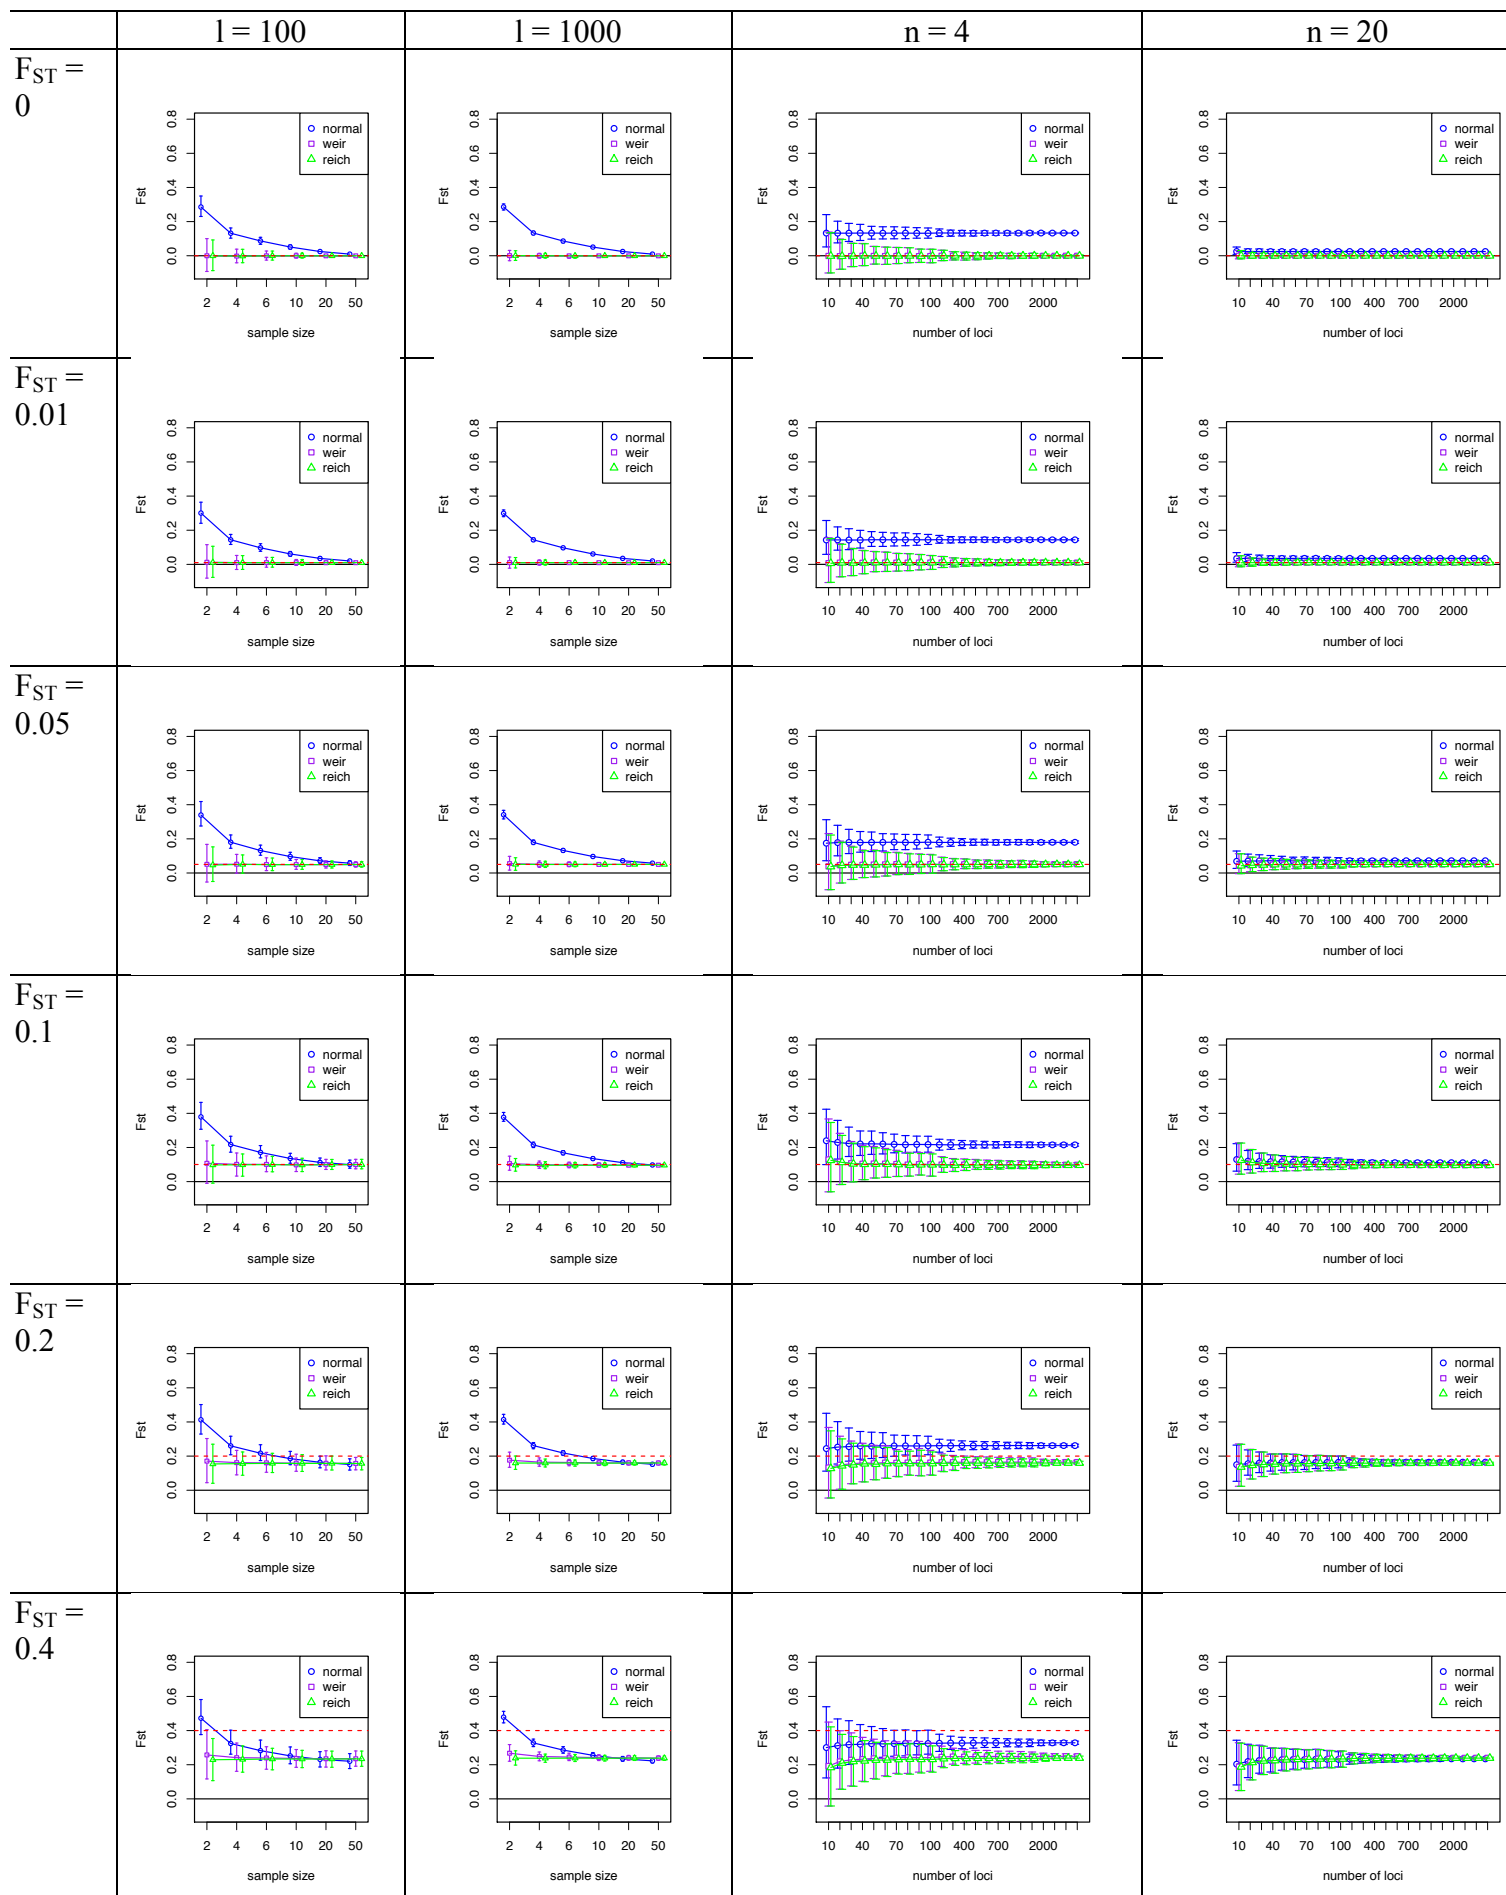

Supplement: S3 (10.1371/journal.pone.0042649.s003) [file journal.pone.0042649.s003]
